# Supplementary material for: Bridging the Subjective-Objective Soundscape Gap: A Multi-Seasonal Framework for Prioritized Optimization in Urban Parks Under Traffic Noise
Source: Research Square preprint supplement (doi:10.21203/rs.3.rs-8481112/v1), 2026-01-07
Supplement: Supplementary file 1 [file 73492ec65051cc1c81fe9737.docx]

**Supplementary Material A. Soundwalk Questionnaire**

| **Soundwalk Questionnaire for Daijiahu Park** | | | | | | |
| --- | --- | --- | --- | --- | --- | --- |
| Natural Sounds | | (A). Bird Songs;  (C). Wind in the Leaves; | | (B). Frog and Insect Chirps;  (D). Water Sounds | | |
| Living Sounds | | (E). Instrumental;  (G). Conversation;  (I). Sports Sounds; | | (F). Singing;  (H). Children's Play; | | |
| Artificial Sounds | | (J). Car Noises;  (L). High-Speed Train;  (N). Construction Noise. | | (K). Train Noises;  (M). Square Dance Music; | | |
| **Survey Scoring Main Table** | | | | | | |
| Sample Point | Primary Sound Category | Subjective Loudness / Score | Sound Comforta / Score | Sound Satisfactionb / Score | Noise Without Train | Noise With Train |
| Fill in the serial numbers of the 3 main sounds | 1 point for Noisy - 5 points for Quiet | 1 point for Uncomfortable - 5 points for Comfortable | 1 point for Dissatisfied - 5 points for Satisfied | dB(A) | dB(A) |
|  |  |  |  |  |  |  |
|  |  |  |  |  |  |  |
|  |  |  |  |  |  |  |
|  |  |  |  |  |  |  |
|  |  |  |  |  |  |  |
|  |  |  |  |  |  |  |
|  |  |  |  |  |  |  |
|  |  |  |  |  |  |  |
|  |  |  |  |  |  |  |
|  |  |  |  |  |  |  |
|  |  |  |  |  |  |  |
|  |  |  |  |  |  |  |
|  |  |  |  |  |  |  |
| Notes:   1. Sound Comfort: Whether the sound is comfortable to you. 2. Sound Satisfaction: Your level of satisfaction with the soundscape. 3. Noisy ( 1 point ); Somewhat noisy ( 2 points ); Neither noisy nor quiet ( 3 points ); Somewhat quiet ( 4 points ); Quiet ( 5 points ). | | | | | | |

**Supplementary Material B. data**

Table S1 Table of Seasonal Average Sound Pressure Levels at Each Sampling Point

| **Sample Point** | **Spring Average SPL/dB**  **(A)** | **Summer Average SPL/dB**  **(A)** | **Autumn Average SPL/dB**  **(A)** | **Winter Average SPL/dB**  **(A)** |
| --- | --- | --- | --- | --- |
| 1 | 71.5 | 73.13 | 75.4 | 70.33 |
| 2 | 62.17 | 68.43 | 65.04 | 62.2 |
| 3 | 65.21 | 72.12 | 67.27 | 64.98 |
| 4 | 64.98 | 66.67 | 68.22 | 65 |
| 5 | 62.46 | 69.62 | 65.17 | 62.6 |
| 6 | 61.87 | 73.56 | 65.74 | 61.87 |
| 7 | 63.59 | 75.28 | 67.5 | 61.89 |
| 8 | 64.67 | 68.44 | 68.68 | 65.33 |
| 9 | 62.97 | 64.54 | 65.09 | 62.82 |
| 10 | 60.1 | 70.76 | 64.79 | 61.71 |
| 11 | 62.7 | 68.64 | 63.63 | 63.07 |
| 12 | 60.07 | 72.93 | 63.88 | 60.94 |
| 13 | 65.59 | 81.12 | 69.94 | 65.02 |
| 14 | 63.84 | 66.24 | 65.6 | 63.7 |
| 15 | 58.12 | 68.21 | 60.58 | 59.62 |
| 16 | 60.71 | 73.42 | 62.56 | 61.02 |
| 17 | 66.71 | 73.56 | 70.82 | 66.77 |
| 18 | 62.06 | 67.01 | 63.87 | 64.12 |
| 19 | 57.03 | 65.1 | 60.71 | 59.46 |
| 20 | 60.61 | 75.43 | 64.86 | 64.08 |
| 21 | 72.46 | 74.59 | 72.12 | 72.3 |
| 22 | 58.17 | 71.77 | 65.7 | 61.67 |
| 23 | 60.1 | 65.62 | 59.09 | 60.26 |
| 24 | 60.04 | 70.44 | 64.1 | 60.78 |
| 25 | 64.16 | 75 | 69.16 | 65.58 |
| 26 | 63.52 | 73.68 | 66.23 | 65.01 |
| 27 | 56.47 | 64.3 | 57.41 | 62.12 |
| 28 | 57.33 | 75.59 | 60.64 | 58.77 |
| 29 | 61.08 | 72.3 | 61.7 | 60.4 |
| 30 | 62.08 | 71.57 | 64.07 | 62.87 |
| 31 | 68.3 | 72.12 | 71.78 | 69.23 |
| 32 | 57.43 | 69.64 | 59.88 | 56.63 |
| 33 | 55.62 | 75.22 | 58.72 | 55.14 |
| 34 | 59.3 | 72.98 | 59.14 | 58.87 |
| 35 | 61.12 | 72.73 | 62.97 | 61.24 |
| 36 | 62.13 | 65 | 61.62 | 63.42 |
| 37 | 62.16 | 67.74 | 65.01 | 62.71 |
| 38 | 55.97 | 75.47 | 57.42 | 55.81 |
| 39 | 56.08 | 78 | 57.28 | 61.31 |
| 40 | 58.92 | 65.78 | 62.47 | 59.3 |
| 41 | 58.39 | 66.49 | 59.12 | 58.73 |
| 42 | 60.14 | 63.98 | 61.83 | 62.07 |
| 43 | 56.7 | 74.4 | 58.4 | 57.84 |
| 44 | 56.53 | 78.2 | 59.19 | 57.71 |
| 45 | 59.28 | 80.12 | 59.52 | 56.94 |
| 46 | 56.61 | 72.56 | 59.19 | 56.39 |
| 47 | 57.2 | 64.27 | 60.66 | 58.32 |
| 48 | 60.12 | 66.41 | 61.39 | 60.03 |
| 49 | 67.97 | 68.07 | 67.2 | 64.79 |
| 50 | 55.94 | 71.28 | 57.16 | 59.38 |
| 51 | 59.28 | 60.98 | 60.43 | 59.48 |
| 52 | 55.21 | 75.28 | 58.06 | 55.64 |
| 53 | 55.5 | 64.86 | 58.41 | 55.87 |
| 54 | 59.49 | 61.62 | 58.01 | 55.34 |

Table S2 Table of Seasonal Soundwalk Scores at Each Sampling Point

|  | **Spring** | | | **Summer** | | | **Autumn** | | | **Winter** | | |
| --- | --- | --- | --- | --- | --- | --- | --- | --- | --- | --- | --- | --- |
| **Sample Point** | **subjective loudness** | **soundscape comfort** | **soundscape satisfaction** | **subjective loudness** | **soundscape comfort** | **soundscape satisfaction** | **subjective loudness** | **soundscape comfort** | **soundscape satisfaction** | **subjective loudness** | **soundscape comfort** | **soundscape satisfaction** |
| 1 | 1.00 | 1.50 | 1.25 | 1.20 | 1.20 | 1.20 | 1.50 | 1.50 | 1.50 | 2.50 | 2.00 | 2.00 |
| 2 | 1.88 | 2.00 | 1.88 | 1.80 | 2.00 | 2.00 | 2.50 | 2.50 | 2.50 | 1.50 | 1.50 | 1.50 |
| 3 | 1.38 | 1.75 | 1.63 | 1.80 | 2.00 | 1.80 | 2.50 | 3.00 | 3.00 | 1.50 | 1.50 | 2.00 |
| 4 | 1.75 | 1.63 | 1.63 | 2.80 | 2.80 | 2.80 | 2.00 | 2.00 | 2.00 | 2.00 | 2.00 | 2.00 |
| 5 | 2.00 | 2.00 | 1.88 | 1.80 | 2.20 | 1.80 | 2.00 | 2.00 | 2.00 | 2.00 | 2.50 | 2.50 |
| 6 | 2.63 | 2.75 | 2.75 | 1.80 | 2.00 | 2.00 | 3.00 | 3.00 | 3.00 | 2.00 | 2.00 | 2.00 |
| 7 | 2.50 | 2.13 | 2.25 | 1.20 | 1.40 | 1.20 | 1.50 | 1.50 | 1.50 | 1.50 | 2.00 | 1.50 |
| 8 | 1.50 | 1.75 | 1.88 | 2.20 | 2.00 | 2.20 | 2.50 | 2.50 | 3.00 | 2.50 | 2.50 | 2.50 |
| 9 | 1.50 | 1.63 | 1.88 | 2.40 | 2.20 | 2.20 | 2.50 | 2.50 | 2.50 | 2.50 | 2.50 | 2.50 |
| 10 | 2.50 | 2.50 | 3.00 | 1.80 | 1.80 | 2.00 | 3.00 | 3.00 | 3.00 | 2.00 | 2.50 | 2.00 |
| 11 | 2.13 | 2.00 | 1.63 | 2.20 | 2.40 | 2.20 | 2.00 | 2.00 | 2.00 | 2.50 | 2.50 | 2.50 |
| 12 | 3.00 | 2.63 | 2.75 | 1.60 | 2.00 | 1.60 | 1.50 | 2.00 | 1.50 | 3.00 | 3.50 | 3.50 |
| 13 | 1.88 | 2.13 | 2.00 | 1.00 | 1.00 | 1.00 | 1.50 | 1.50 | 1.50 | 3.00 | 3.00 | 2.50 |
| 14 | 2.50 | 3.13 | 3.00 | 2.40 | 2.40 | 2.80 | 1.50 | 2.00 | 2.00 | 3.00 | 3.50 | 3.00 |
| 15 | 3.25 | 3.25 | 3.50 | 3.00 | 2.80 | 3.00 | 3.00 | 3.00 | 3.00 | 4.00 | 4.00 | 4.00 |
| 16 | 2.63 | 2.88 | 3.00 | 2.60 | 2.60 | 2.60 | 2.50 | 2.50 | 2.50 | 3.00 | 3.00 | 3.00 |
| 17 | 2.00 | 2.00 | 2.00 | 1.60 | 1.60 | 1.60 | 1.00 | 1.00 | 1.00 | 1.50 | 2.00 | 2.00 |
| 18 | 3.13 | 3.00 | 3.38 | 3.20 | 3.20 | 3.60 | 2.50 | 2.50 | 2.50 | 3.00 | 3.00 | 3.00 |
| 19 | 3.25 | 3.38 | 3.38 | 3.20 | 3.40 | 3.60 | 2.00 | 2.00 | 2.00 | 4.00 | 4.00 | 4.00 |
| 20 | 3.25 | 3.25 | 3.13 | 2.00 | 2.00 | 2.00 | 2.00 | 2.00 | 2.00 | 3.00 | 3.00 | 3.00 |
| 21 | 1.38 | 1.38 | 1.38 | 1.20 | 1.20 | 1.20 | 1.00 | 1.00 | 1.00 | 1.50 | 1.50 | 1.50 |
| 22 | 3.25 | 3.25 | 2.88 | 2.80 | 2.80 | 2.80 | 3.50 | 3.00 | 3.50 | 2.50 | 3.00 | 3.00 |
| 23 | 3.50 | 3.50 | 3.63 | 3.40 | 3.80 | 3.80 | 4.00 | 4.00 | 4.00 | 2.00 | 3.00 | 3.00 |
| 24 | 3.13 | 3.13 | 3.00 | 2.40 | 2.40 | 2.60 | 2.50 | 2.50 | 2.50 | 2.50 | 3.00 | 3.00 |
| 25 | 2.13 | 2.38 | 2.50 | 1.80 | 1.60 | 1.60 | 2.50 | 2.50 | 3.00 | 1.50 | 2.00 | 2.00 |
| 26 | 2.13 | 2.50 | 2.50 | 2.00 | 2.20 | 2.00 | 2.50 | 2.50 | 2.50 | 2.50 | 3.00 | 3.00 |
| 27 | 3.63 | 3.88 | 3.88 | 2.80 | 2.40 | 2.60 | 4.00 | 4.00 | 4.00 | 4.00 | 4.00 | 4.00 |
| 28 | 3.38 | 3.63 | 3.88 | 2.60 | 2.60 | 2.40 | 3.50 | 4.00 | 4.00 | 2.50 | 3.00 | 3.00 |
| 29 | 3.00 | 3.25 | 3.25 | 2.60 | 2.00 | 2.60 | 2.50 | 2.50 | 2.50 | 1.50 | 2.00 | 2.50 |
| 30 | 2.63 | 2.75 | 2.50 | 1.40 | 1.40 | 1.40 | 1.50 | 1.50 | 1.50 | 2.00 | 2.00 | 2.00 |
| 31 | 1.75 | 1.88 | 1.75 | 1.00 | 1.20 | 1.20 | 1.00 | 1.00 | 1.00 | 1.00 | 1.00 | 1.00 |
| 32 | 3.25 | 3.63 | 3.75 | 3.00 | 2.80 | 2.80 | 3.00 | 3.00 | 3.00 | 3.00 | 3.00 | 3.00 |
| 33 | 3.63 | 3.63 | 3.63 | 2.20 | 2.40 | 2.40 | 3.00 | 3.00 | 3.00 | 3.00 | 3.00 | 3.00 |
| 34 | 3.38 | 3.50 | 3.71 | 2.40 | 2.20 | 2.40 | 3.50 | 3.50 | 3.50 | 2.50 | 3.00 | 3.00 |
| 35 | 2.50 | 2.75 | 3.00 | 2.40 | 2.20 | 2.40 | 1.50 | 1.50 | 1.50 | 2.50 | 3.00 | 2.50 |
| 36 | 3.13 | 3.00 | 3.00 | 2.20 | 2.20 | 2.00 | 2.50 | 2.50 | 2.50 | 2.50 | 3.00 | 3.00 |
| 37 | 2.63 | 2.88 | 2.75 | 2.00 | 1.80 | 1.60 | 2.50 | 2.50 | 2.50 | 2.50 | 3.00 | 3.00 |
| 38 | 2.88 | 3.13 | 3.13 | 2.20 | 2.40 | 2.20 | 3.50 | 3.50 | 4.00 | 4.00 | 4.00 | 4.00 |
| 39 | 3.88 | 4.00 | 4.13 | 2.00 | 2.20 | 2.20 | 4.00 | 4.00 | 4.00 | 4.00 | 4.00 | 4.00 |
| 40 | 3.38 | 3.75 | 3.63 | 3.00 | 3.00 | 3.00 | 2.50 | 2.50 | 2.50 | 3.00 | 3.00 | 3.50 |
| 41 | 4.00 | 3.88 | 3.75 | 2.80 | 2.80 | 2.80 | 3.00 | 3.50 | 3.00 | 4.00 | 3.50 | 4.00 |
| 42 | 2.88 | 3.13 | 3.25 | 3.20 | 3.00 | 3.60 | 2.50 | 3.00 | 3.00 | 3.00 | 3.50 | 3.50 |
| 43 | 2.88 | 2.88 | 3.13 | 2.80 | 2.60 | 2.60 | 2.00 | 2.00 | 2.00 | 3.00 | 3.00 | 3.00 |
| 44 | 3.88 | 4.13 | 4.13 | 1.80 | 1.80 | 1.60 | 3.00 | 3.50 | 3.50 | 4.00 | 4.00 | 4.00 |
| 45 | 4.25 | 4.25 | 4.13 | 1.60 | 1.80 | 1.80 | 3.50 | 4.00 | 3.50 | 4.50 | 5.00 | 5.00 |
| 46 | 3.75 | 3.88 | 4.13 | 2.60 | 2.80 | 2.80 | 3.00 | 3.50 | 3.50 | 4.00 | 4.50 | 4.50 |
| 47 | 3.63 | 3.63 | 3.75 | 3.00 | 2.80 | 3.20 | 3.00 | 3.00 | 3.00 | 3.50 | 3.00 | 3.00 |
| 48 | 3.38 | 3.75 | 3.75 | 3.40 | 3.20 | 3.60 | 3.00 | 3.00 | 2.50 | 1.50 | 2.00 | 2.00 |
| 49 | 2.13 | 2.63 | 3.00 | 2.20 | 2.60 | 2.60 | 1.00 | 1.00 | 1.00 | 4.50 | 5.00 | 5.00 |
| 50 | 3.50 | 4.00 | 4.13 | 2.20 | 2.00 | 2.00 | 3.00 | 3.00 | 3.00 | 4.00 | 4.00 | 4.00 |
| 51 | 3.63 | 3.88 | 3.75 | 2.20 | 2.20 | 2.20 | 2.30 | 3.00 | 3.00 | 3.50 | 3.00 | 3.00 |
| 52 | 3.88 | 3.50 | 3.88 | 3.60 | 3.40 | 3.40 | 3.50 | 3.50 | 4.00 | 3.00 | 3.00 | 3.00 |
| 53 | 3.00 | 3.13 | 3.50 | 3.40 | 3.40 | 3.40 | 3.00 | 3.00 | 3.00 | 3.00 | 3.00 | 3.00 |
| 54 | 3.50 | 3.38 | 3.50 | 2.20 | 2.40 | 2.20 | 2.00 | 2.00 | 2.00 | 2.50 | 2.00 | 2.00 |

Table S3 Environmental Analysis of Sampling Points with Maximum SOSV in Each Season

| **Season** | **Point Information** | **Site Environmental Characteristics** | | **Explanation** |
| --- | --- | --- | --- | --- |
| Spring | No. 45 ("Reflection of Sorrow" scenic spot) | 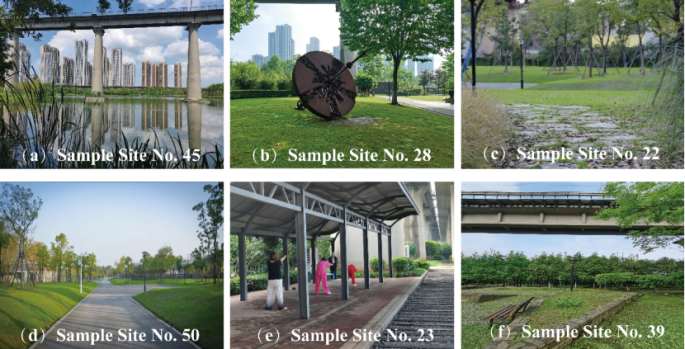 | Close to the lake, rich in types of riparian plants. | Spring-blooming plants like yellow calamus mitigate noise and enhance the subjective soundscape with their visual appeal. |
| Summer | No. 28 ("Steel Sculpture Lawn" scenic spot) | 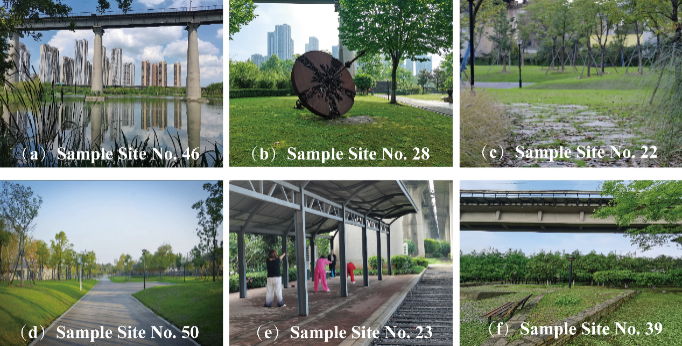 | Open grassy clearings in the sparse woodland are centered by a sculpture of industrial memory. | Capitalize on the layered landscape and popular lawn sculptures in summer to enhance engagement and mask traffic noise. |
| Autumn | No. 22 (Time Track area) | 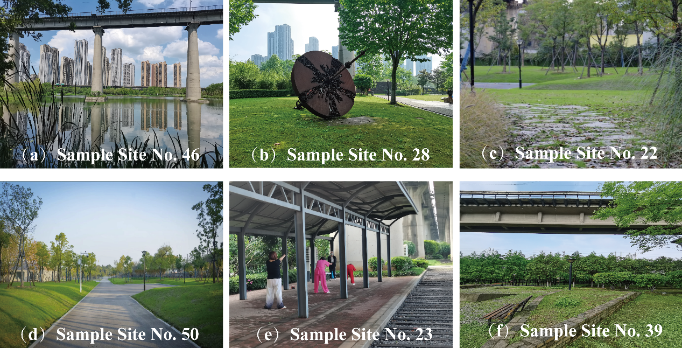 | Closed space under the railway bridge, surrounded by plants. | Noise - proof embankments are built and greened on both sides of the road. Arbor trees have good visual effect and reduce noise annoyance. |
| Winter | No. 50 (dense forest area) | 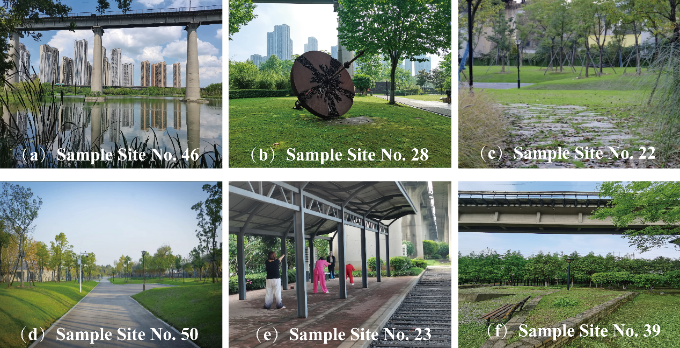 | With plum blossom landscaping, dominated by plant landscape, and the vegetation is "arbor + shrub + herb". | The early spring bloom of plums elevates soundscape perception through the positive experience of flower viewing. |
| Spring, Summer, Autumn | No. 23 (Time Track area) | 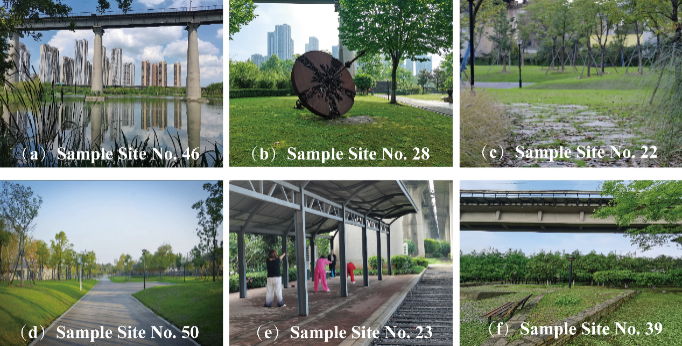 | Closed space under the railway bridge, surrounded by plants. | The closed space has strong privacy, and people feel relatively quiet subjectively. |
| Summer, Autumn, Winter | No. 39 (dense forest area) | 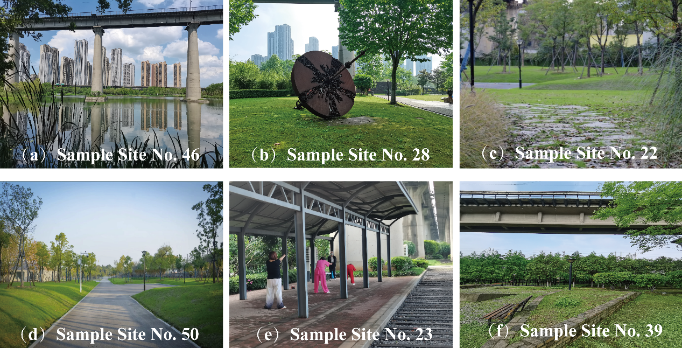 | Slightly undulating terrain, "arbor + shrub + herb" multi - layer structure, with seats. | There are bird songs in the trees, achieving the design effect of soundscape masking. |
| Summer, Winter | No. 46 ("Red Leaf Island" scenic spot) | 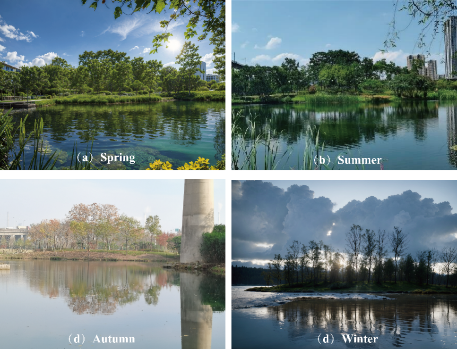 | A secluded island in the lake center, furnished with a pavilion and seats, presents distinctive scenery in all four seasons. | The restorative capacity of well-planted green space mitigates the negative effects of environmental noise by enhancing perceptual comfort and reducing pressure. |

Table S4 Detailed Information of 54 Sample Points in Daijia Lake Park

| **Sample Point Number** | **Longitude** | **Latitude** | **Altitude**  **(m)** | **Shortest Distance to Road* (m)** | **Distance to the Third Ring Road/Main Road (m)** | **Shortest Distance to Railway Line (m)** |
| --- | --- | --- | --- | --- | --- | --- |
| 1 | 114.4076 | 30.6454 | 13.25 | 6 | 28 | 72 |
| 2 | 114.4072 | 30.6450 | 17.95 | 80 | 60 | 15 |
| 3 | 114.4077 | 30.6450 | 16.86 | 25 | 28 | 68 |
| 4 | 114.4080 | 30.6450 | 18.57 | 2 | 2 | 105 |
| 5 | 114.4087 | 30.6449 | 17.05 | 25 | 25 | 162 |
| 6 | 114.4094 | 30.6448 | 22.34 | 45 | 62 | 207 |
| 7 | 114.4100 | 30.6448 | 22.12 | 10 | 96 | 268 |
| 8 | 114.4064 | 30.6444 | 5.86 | 8 | 178 | 20 |
| 9 | 114.4068 | 30.6444 | 10.29 | 75 | 118 | 0 |
| 10 | 114.4077 | 30.6446 | 16.54 | 62 | 62 | 48 |
| 11 | 114.4086 | 30.6447 | 17.02 | 0 | 0 | 133 |
| 12 | 114.4099 | 30.6445 | 23.17 | 60 | 75 | 240 |
| 13 | 114.4105 | 30.6441 | 24.76 | 10 | 95 | 277 |
| 14 | 114.4072 | 30.6436 | 29.53 | 45 | 180 | 0 |
| 15 | 114.4080 | 30.6432 | 10.44 | 116 | 125 | 16 |
| 16 | 114.4086 | 30.6431 | 23.03 | 85 | 85 | 56 |
| 17 | 114.4101 | 30.6435 | 29.13 | 10 | 10 | 208 |
| 18 | 114.4074 | 30.6427 | 26.14 | 53 | 224 | 0 |
| 19 | 114.4081 | 30.6425 | 25.30 | 128 | 150 | 5 |
| 20 | 114.4092 | 30.6426 | 22.51 | 65 | 65 | 92 |
| 21 | 114.4099 | 30.6427 | 27.11 | 5 | 5 | 156 |
| 22 | 114.4073 | 30.6416 | 18.96 | 45 | 297 | 33 |
| 23 | 114.4079 | 30.6411 | 14.71 | 85 | 268 | 0 |
| 24 | 114.4092 | 30.6417 | 18.11 | 55 | 133 | 48 |
| 25 | 114.4095 | 30.6415 | 22.92 | 14 | 115 | 77 |
| 26 | 114.4070 | 30.6410 | 18.32 | 8 | 335 | 68 |
| 27 | 114.4079 | 30.6407 | 14.37 | 90 | 300 | 6 |
| 28 | 114.4086 | 30.6409 | 19.50 | 93 | 236 | 9 |
| 29 | 114.4096 | 30.6407 | 15.42 | 20 | 180 | 24 |
| 30 | 114.4104 | 30.6404 | 27.41 | 15 | 115 | 104 |
| 31 | 114.4117 | 30.6408 | 21.00 | 0 | 0 | 233 |
| 32 | 114.4076 | 30.6403 | 16.99 | 42 | 353 | 55 |
| 33 | 114.4080 | 30.6398 | 29.80 | 112 | 336 | 14 |
| 34 | 114.4090 | 30.6396 | 24.27 | 102 | 282 | 17 |
| 35 | 114.4100 | 30.6400 | 22.08 | 10 | 189 | 37 |
| 36 | 114.4107 | 30.6398 | 19.03 | 3 | 137 | 105 |
| 37 | 114.4118 | 30.6400 | 17.22 | 25 | 34 | 212 |
| 38 | 114.4084 | 30.6388 | 25.98 | 52 | 390 | 23 |
| 39 | 114.4092 | 30.6390 | 20.21 | 139 | 313 | 16 |
| 40 | 114.4104 | 30.6393 | 16.62 | 48 | 187 | 61 |
| 41 | 114.4112 | 30.6393 | 23.12 | 52 | 134 | 128 |
| 42 | 114.4122 | 30.6392 | 14.06 | 44 | 61 | 220 |
| 43 | 114.4131 | 30.6387 | 24.01 | 13 | 27 | 289 |
| 44 | 114.4094 | 30.6379 | 21.76 | 228 | 357 | 25 |
| 45 | 114.4095 | 30.6385 | 11.87 | 188 | 330 | 30 |
| 46 | 114.4110 | 30.6382 | 20.35 | 190 | 228 | 78 |
| 47 | 114.4121 | 30.6383 | 17.00 | 120 | 130 | 184 |
| 48 | 114.4130 | 30.6382 | 20.42 | 61 | 73 | 264 |
| 49 | 114.4138 | 30.6385 | 26.38 | 0 | 0 | 344 |
| 50 | 114.4105 | 30.6375 | 19.10 | 350 | 313 | 11 |
| 51 | 114.4115 | 30.6373 | 14.04 | 219 | 234 | 120 |
| 52 | 114.4121 | 30.6372 | 14.49 | 191 | 206 | 162 |
| 53 | 114.4129 | 30.6369 | 14.07 | 134 | 134 | 248 |
| 54 | 114.4136 | 30.6372 | 26.55 | 73 | 73 | 309 |

*Including Ramps, Expressways, etc.
